# Supplementary material
Source: PubMed Central journal article supplement (PMC3348541)

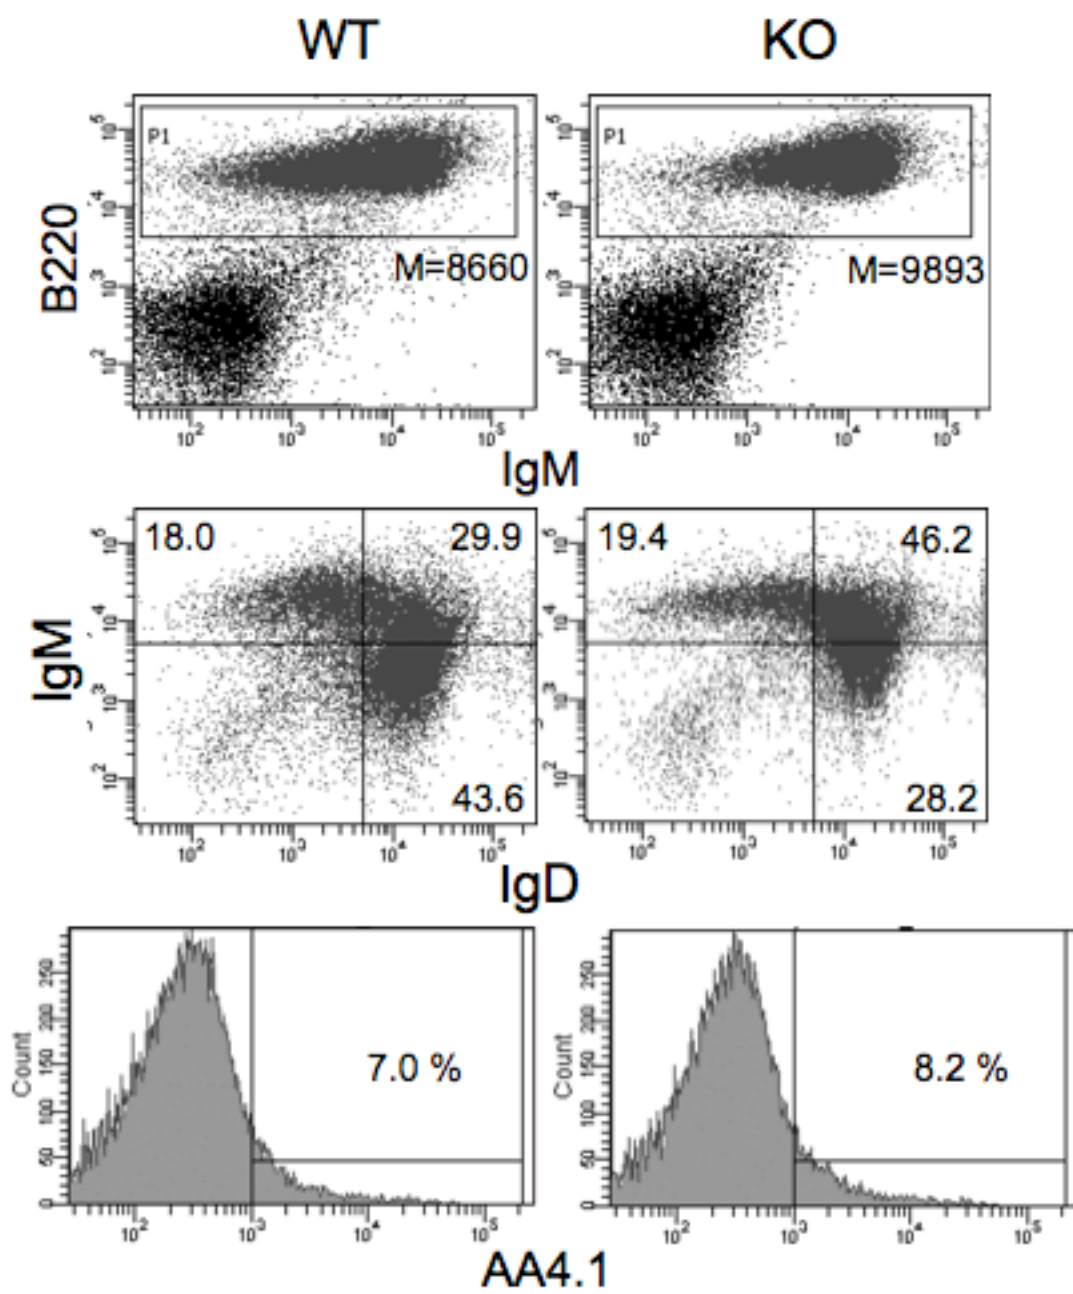

Supplemental Figure 2

Supplement: NIHMS317378-supplement-3.pdf [file NIHMS317378-supplement-3.pdf]

I $\kappa$ BNS WT

I $\kappa$ BNS KO

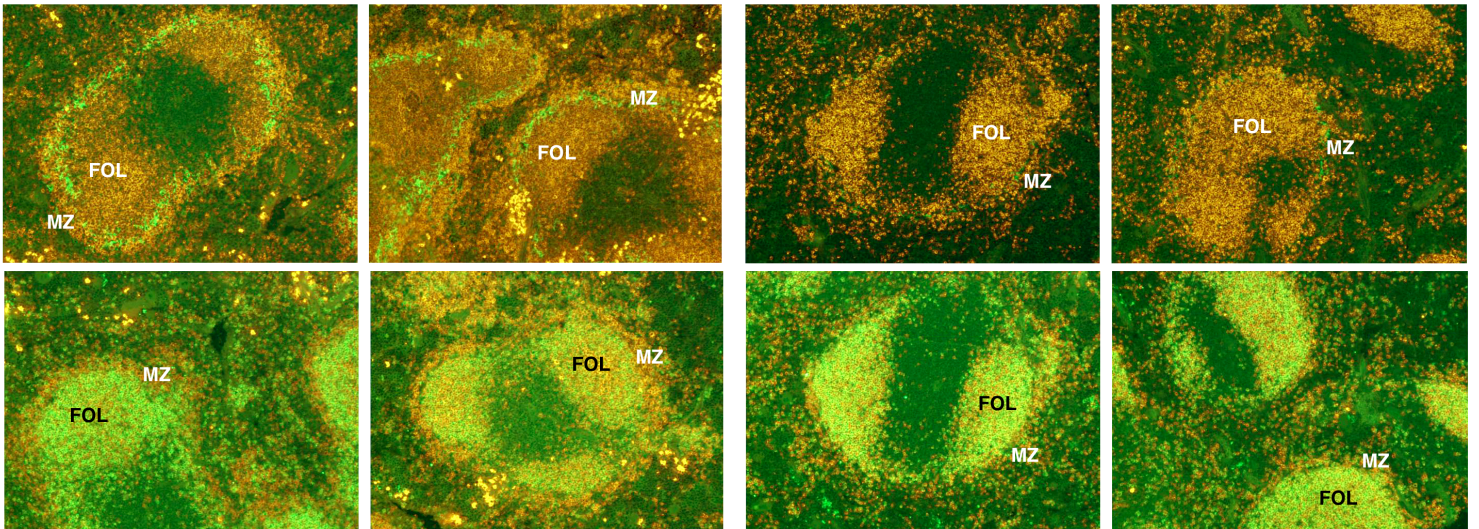

100  $\mu$ m

Supplement: NIHMS317378-supplement-4.pdf [file NIHMS317378-supplement-4.pdf]

Supplemental Figure 4

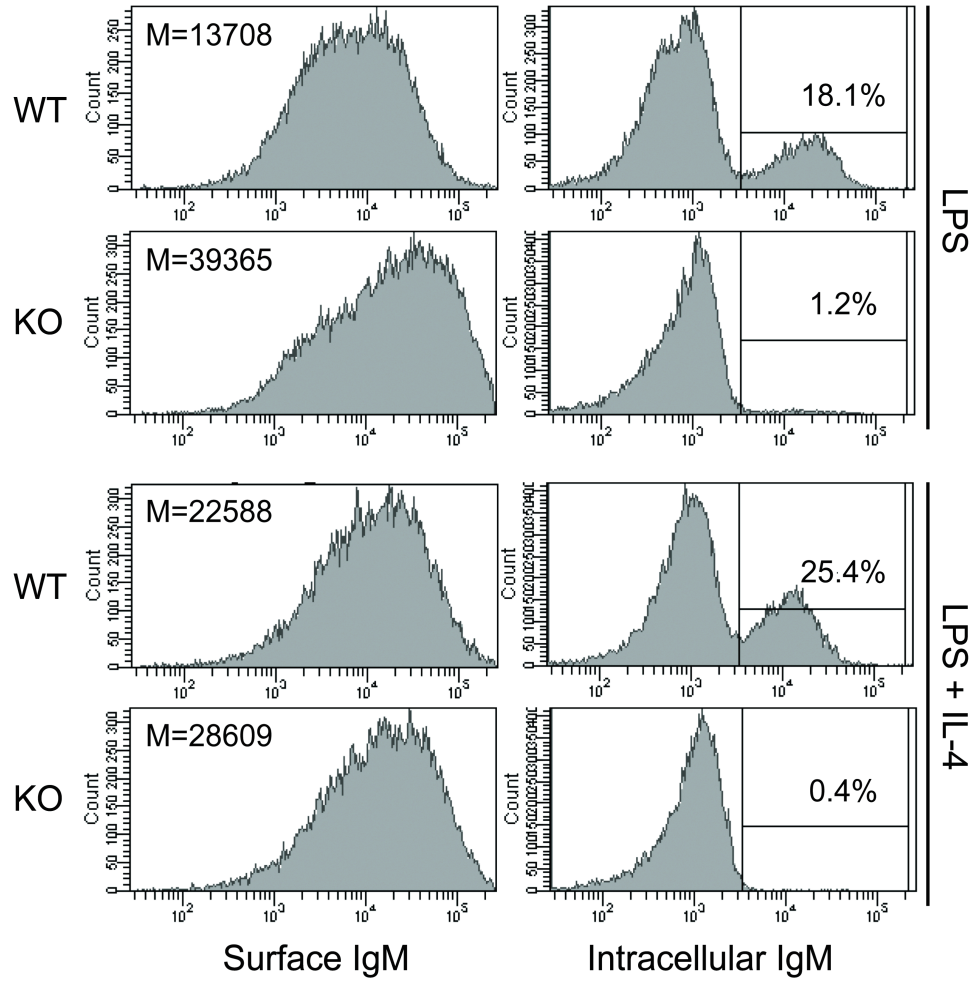

Supplement: NIHMS317378-supplement-5.pdf [file NIHMS317378-supplement-5.pdf]

Supplemental Figure 6

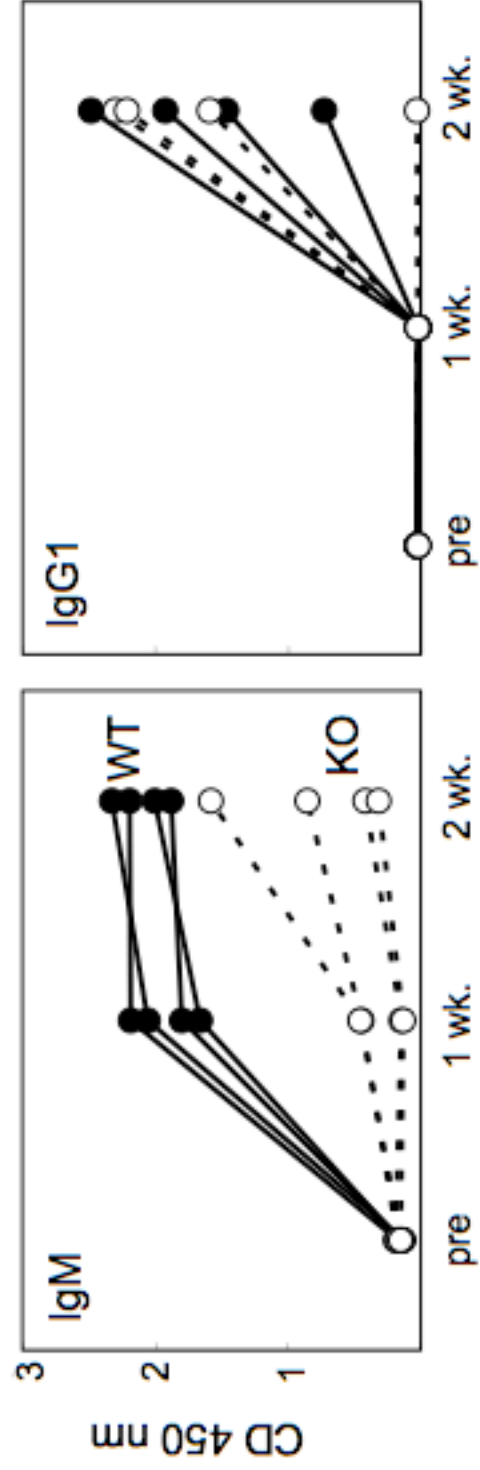

Supplement: NIHMS317378-supplement-7.pdf [file NIHMS317378-supplement-7.pdf]
